# Supplementary material
Source: publisher site journal article supplement (https://www.spandidos-publications.com/5292/downloadSupplementary)

Figure S1. Four osteosarcoma specimens and one normal bone tissue specimen were stained using H&E. Magnification, x20.

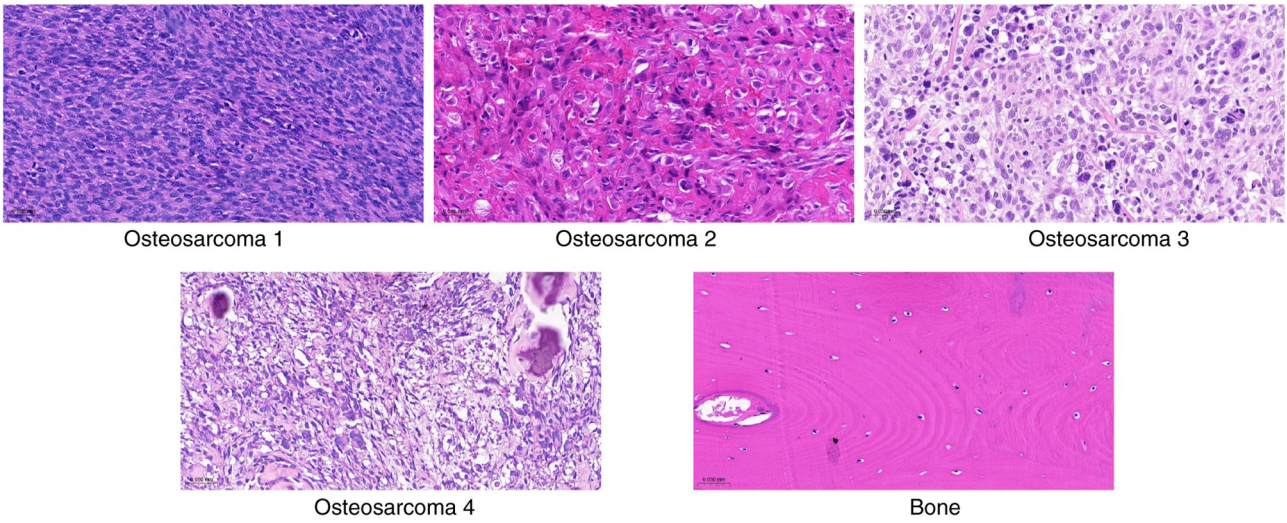

Figure S2. Activated macrophages promote the apoptosis of OS. (A) The apoptotic effect of LPS and CD47mAb on OS cells. (B) Quantitative analysis of the apoptosis assays shown in panel A. (C) The effect of polarized macrophages on the apoptosis of OS cells. (D) Quantitative analysis of the apoptosis assays shown in panel C. Data are presented as the mean  $\pm$  SD of three independent experiments. \*\* $P < 0.01$  and \*\*\* $P < 0.001$  vs. K or as otherwise indicated. n.s., not significant; K, K7M2; R, RAW264.7; KR, K7M2 + RAW264.7; LPS, lipopolysaccharide; CD47mAb, CD47 monoclonal antibody; OS, osteosarcoma.

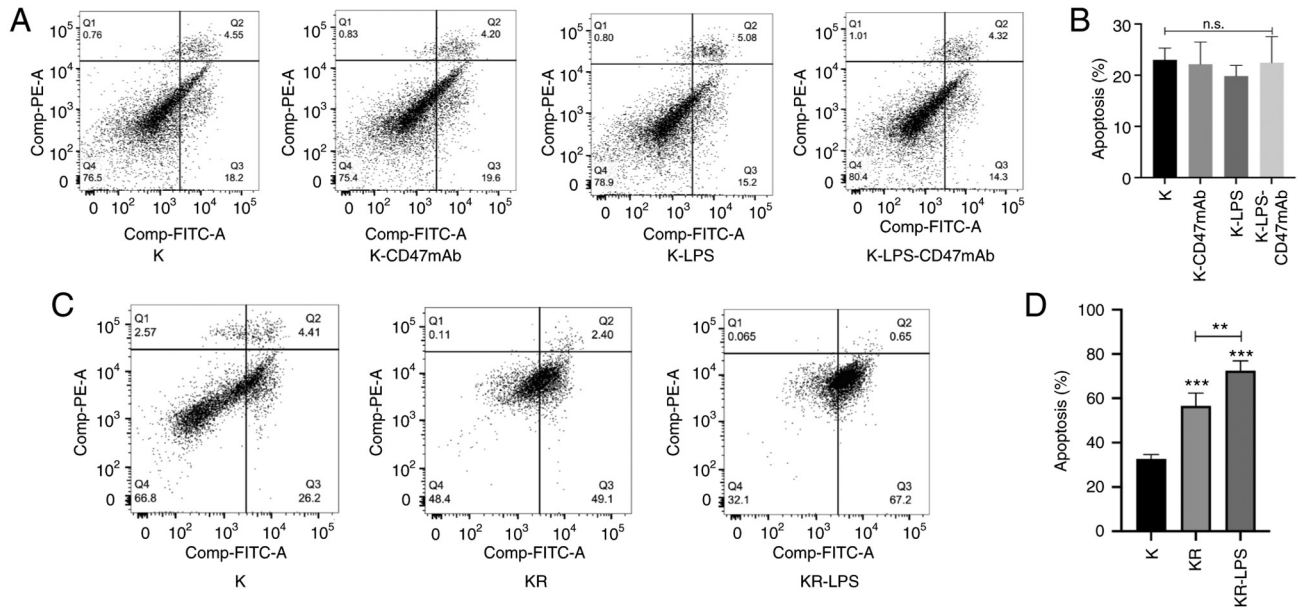

Supplement: Supplementary file 1 [file downloadSupplementary]
